# Supplementary material for: Bone marrow pericyte dysfunction in individuals with type 2 diabetes
Source: Springer Nature journal article supplement (doi:10.1007/s00125-019-4865-6), 2019-04-17
Supplement: MOESM1 [file 16665286]

**ESM Table 1** Antibodies used for flow cytometry

| Antigen | Fluorophore | Supplier          | Cat#        | Dilution |
|---------|-------------|-------------------|-------------|----------|
| CD105   | FITC        | Thermo Scientific | MA1-19594   | 1/25     |
| CD14    | APC         | BioLegend         | 301808      | 1/30     |
| CD146   | PE-Cy7      | BD Biosciences    | 562135      | 1/10     |
| CD16    | PerCP       | BioLegend         | 302030      | 1/20     |
| CD184   | APC         | BD Biosciences    | 555976      | 1/10     |
| CD31    | PE          | BD Biosciences    | 560983      | 1/10     |
| CD34    | FITC        | Miltenyi          | 130-081-001 | 1/20     |
| CD44    | PE          | BD Biosciences    | 550989      | 1/10     |
| CD45    | APC-H7      | BD Biosciences    | 560178      | 1/10     |
| CD73    | PE-Cy7      | BD Biosciences    | 344010      | 1/10     |
| CD90    | PE          | BD Biosciences    | 555596      | 1/10     |

**ESM Table 2** List of antibodies used for western blot analyses

| Protein target   | Supplier                   | Catalogue number |
|------------------|----------------------------|------------------|
| p-AKT (Ser473)   | Cell Signalling Technology | 9271             |
| p-AKT (Thr308)   | Cell Signalling Technology | 9275             |
| AKT              | Cell Signalling Technology | 9272             |
| $\beta$ -Tubulin | Cell Signalling Technology | 86298            |
| $\beta$ -Actin   | Sigma-Aldrich              | A5441 (AC15)     |

**ESM Table 3** List of antibodies used for immunohistochemistry (IHC) and immunocytochemistry (ICC)

| Antigen                     | Application | Isotype    | Clone      | Concentration | Brand                        | Code     | Secondary Ab (Alexa Fluor) |
|-----------------------------|-------------|------------|------------|---------------|------------------------------|----------|----------------------------|
| Human MCAM                  | IHC         | Mouse IgG  | 1/MCAM     | 1/50          | BD Transduction Laboratories | 611208   | Mouse dev. Goat 568        |
| Von Willebrand Factor       | IHC         | Rabbit IgG | polyclonal | 1/30          | Abcam                        | ab9378   | Rabbit dev. Goat 488       |
| CD146                       | IHC, ICC    | Rabbit IgG | EPR3208    | 1/50          | Abcam                        | ab75769  | Rabbit dev. Goat 568       |
| PGP9.5                      | IHC         | Mouse IgG  | PGP9.5     | 1/100         | Abcam                        | ab72911  | Mouse dev. Goat 488        |
| Human Actin (Smooth Muscle) | IHC         | Mouse IgG  | 1A4        | 1/100         | Agilent DAKO                 | GA611    | Mouse dev. Goat 488        |
| Nestin                      | IHC, ICC    | Mouse IgG  | GT623      | 1/50          | Abcam                        | ab184543 | Mouse dev. Donkey 467      |
| SDF1/CXCL12                 | IHC, ICC    | Rabbit IgG | polyclonal | 1/100         | Cell Signaling               | 3740S    | Rabbit dev. Donkey 568     |
| VE Cadherin                 | ICC         | Rabbit IgG | polyclonal | 1/50          | Abcam                        | ab33168  | Rabbit dev. Donkey 568     |
| PDGF Receptor $\beta$       | ICC         | Rabbit IgG | 28E1       | 1/50          | Cell Signaling               | 3169S    | Rabbit dev. Donkey 568     |
| NG2                         | ICC         | Rabbit IgG | HMB45      | 1/50          | Abcam                        | ab83508  | Rabbit dev. Goat 488       |
| VEGFR2                      | ICC         | Rabbit IgG | polyclonal | 1/50          | Abcam                        | ab9530   | Rabbit dev. Goat 488       |

**ESM Table 4** List of primers used for qPCR

| Gene                    | Forward primer (5'–3')        | Reverse primer (5'–3')       |
|-------------------------|-------------------------------|------------------------------|
| <i>ACTB</i>             | 5'-TGGACATCCGCAAAGACCTGTA-3'  | 5'-GGGCAGTGATCTCCTTCTGCAT-3' |
| <i>ANGPT1</i>           | 5'-ACAGGAGGATGGTGGTTTGA-3'    | 5'-CGCTTCTGACATTGCGCTTT-3'   |
| <i>ANGPT2</i>           | 5'-TCAGTGGCTAATGAAGCTTGAGA-3' | 5'-CCGCTGTTTGGTTCAACAGG-3'   |
| <i>CXCL10</i>           | 5'-GCCATTCTGATTTGCTGCCT-3'    | 5'-GCAGGTACAGCGTACAGTTCT-3'  |
| <i>CXCL12</i>           | 5'-ATTCTCAACACTCCAAACTGTGC-3' | 5'-ACTTTAGCTTCGGGTCAATGC-3'  |
| <i>DLK1</i>             | 5'-GCTTTCTAATCGGCTCGGGA-3'    | 5'-CGGCGACTTTCGTTTTTCCTC-3'  |
| <i>DLK4<sup>a</sup></i> | 5'-TTGCCACCAGATGCACTCAT-3'    | 5'-CACATAGTGGCCGAAGTGGT-3'   |
| <i>EFNB2</i>            | 5'-CCATGGTAACCAGCCACAGT-3'    | 5'-CCCCTCTCCCCATCCTAAA-3'    |
| <i>FGF2</i>             | 5'-TCCACCTATAATTGGTCAA-3'     | 5'-CATCAGTTACCAGCTCCCCC-3'   |
| <i>IGFBP2</i>           | 5'-CGAGGGCACTTGTGAGAAGC-3'    | 5'-CCAGCTCCTTTCATACCCGAC-3'  |
| <i>JAG1</i>             | 5'-CGTCATTGTGTTACCTGCGG-3'    | 5'-TGCGCAGCCTTTTATTCCCT-3'   |
| <i>LEP</i>              | 5'-AATGCATTGGGGAACCCTGT-3'    | 5'-AGGAGACTGACTGCGTGTGT-3'   |
| <i>NRP1</i>             | 5'-GAAACTCCTCTGTCTCCCGC-3'    | 5'-TGTTTCTGGACCCGTTGGAG-3'   |
| <i>SEMA6A</i>           | 5'-GCTAGCAGAAAAGGGACTAACG-3'  | 5'-CGCCTGCTCTCTAGCCAGT-3'    |

|              |                                 |                              |
|--------------|---------------------------------|------------------------------|
| <i>SPRY2</i> | 5'-GCGCTTGTAGAAGGGGAGT-3'       | 5'-ATTCCCCGCTCATGAACA-3'     |
| <i>THBS1</i> | 5'-TGACAACAATCAGGATATATGATGA-3' | 5'-TTGGGCACATAGGGACAGTT-3'   |
| <i>TIE2</i>  | 5'-GGGACCCACACTTCCAACAA-3'      | 5'-TTTGGTATCAGCAGGGCTGG-3'   |
| <i>VEGFA</i> | 5'-TGTCTAATGCCCTGGAGCCT-3'      | 5'-GCTTGTCACATCTGCAAGTAGG-3' |
| <i>VEGFB</i> | 5'-GAGATGTCCCTGGAAGAAC-3'       | 5'-GAGTGGGATGGGTGATGTCAG-3'  |
| <i>18S</i>   | 5'-CCCAGTAAGTGCGGGTCATAA-3'     | 5'-CCGAGGGCCTCACTAAACC-3'    |
| <i>GAPDH</i> | 5'-AGCCGCATCTTCTTTTGCCT-3'      | 5'-TGACGAACATGGGGGCATCA-3'   |

<sup>a</sup>Also known as *DLL4*

## ESM Fig. 1

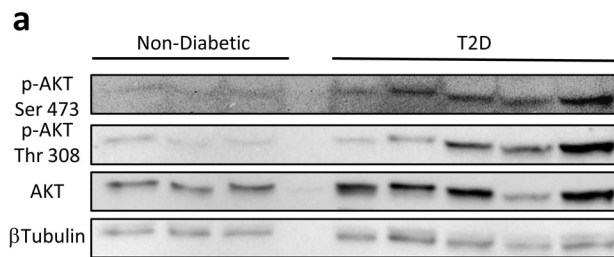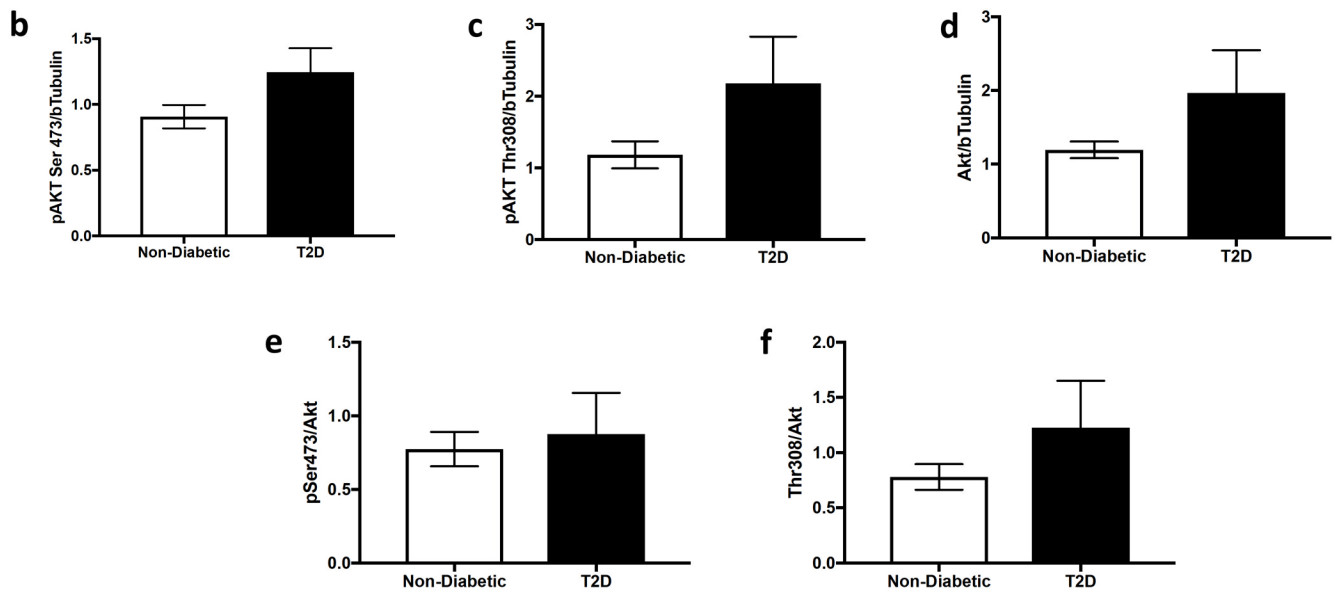

**Supplementary Figure 1. Western blot analysis of AKT.** (a) Blots showing the phosphorylation level of AKT in pericytes isolated from the BM of T2D and nondiabetic patients. Each lane corresponds to an individual cell line. (b-d) Bar graphs showing average results expressed as AKT/tubulin ratio. (e&f) Bar graphs showing average results expressed as pAKT/total AKT ratio. No significant difference was denoted in the comparison. Analysis was performed by Student's t test.
